# Supplementary material
Source: MDPI journal article supplement (https://www.mdpi.com/2073-4433/10/12/801)
Supplement: s1 [file s1]

# Supplementary Materials:

Thomas Pettit <sup>1,\*</sup>, Peter J. Irga <sup>2</sup>, Nicholas C. Surawski <sup>2</sup> and Fraser R. Torpy <sup>1</sup>

<sup>1</sup> Plants and Environmental Quality Research Group, School of Life Sciences, Faculty of Science, University of Technology Sydney, Sydney, NSW 2007, Australia; Fraser.Torpy@uts.edu.au

<sup>2</sup> Centre for Green Technology, School of Civil and Environmental Engineering, University of Technology Sydney, Sydney, NSW 2007, Australia; Peter.Irga@uts.edu.au (P.J.I.); Nicholas.Surawski@uts.edu.au (N.C.S.)

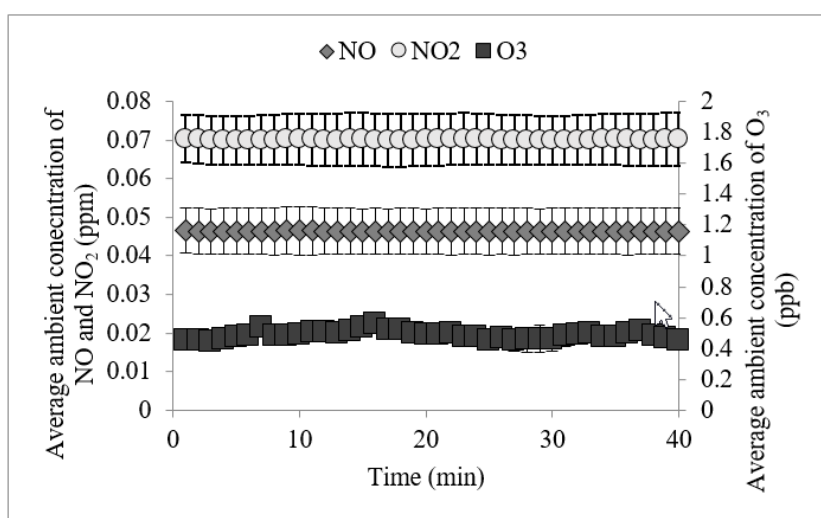

**Figure S1.** The ambient pollution concentration profiles within the flow reactor procedural control treatments (data are means,  $n = 14$ , errors bars represent the SEM).
